# Supplementary material
Source: publisher site journal article supplement (https://www.dovepress.com/article/437937)
Supplement: Supplementary file 1 [file get_supplementary_file.php]

**Supplement**

**Table S1: Acceptable limits for BMI, weight, and height values in CPRD and SAIL (all variables) and DataLoch (BMI and height only).**

| Variable | Age range | Minimum | Maximum | Units |
| --- | --- | --- | --- | --- |
| BMI | 0+ | 10 | 100 | kg/m2 |
| Height | 0–3 | 0.1 | 1.35 | m |
| Height | 4–11 | 0.5 | 2.0 | m |
| Height | 12–17 | 0.5 | 2.5 | m |
| Height | 18+ | 1.21 | 2.5 | m |
| Weight | 0–3 | 0 | 50 | kg |
| Weight | 4+ | 10 | 300 | kg |

**Table S2: Acceptable limits for FEV1 and FEV1 percent predicted (%).**

| Variable | Minimum | Maximum | Units |
| --- | --- | --- | --- |
| FEV1 | 0.1 | 7.0 | L |
| FEV1 percent predicted | 5 | 200 | % |

**Table S3: ERS ‘93 formulae used to predict FEV1 values, where H = height (in metres), A = age (in years).**

| Sex | Formula |
| --- | --- |
| Male | 4.3H - 0.029A - 2.49 |
| Female | 3.95H - 0.025A - 2.6 |

**Table S4: Characteristics of people with a past coded diagnosis for asthma in England, Wales and South-East Scotland alive and registered with GP on 31st December 2019.** Percentages for BMI and smoking status do not include people aged <18 in the denominator.

|  |  | England (CPRD) | | Wales (SAIL) | | South-East Scotland (DataLoch) | |
| --- | --- | --- | --- | --- | --- | --- | --- |
| N | % of non-missing total | N | % of non-missing total | N | % of non-missing total |
| Total |  | 1,254,163 | 100 | 494,914 | 100 | 109,410 | 100 |
| Sex | Male | 584,306 | 46.6 | 236,741 | 47.8 | 53,066 | 48.5 |
| Female | 669,857 | 53.4 | 258,216 | 52.2 | 56,344 | 51.5 |
| Age as of 31 December 2019 | 0-5 | 15,390 | 1.2 | 6,750 | 1.4 | 538 | 0.5 |
| 6-11 | 76,383 | 6.1 | 21,213 | 4.3 | 3,598 | 3.3 |
| 12-17 | 105,132 | 8.4 | 28,920 | 5.8 | 5,749 | 5.3 |
| 18-29 | 205,399 | 16.4 | 94,929 | 19.2 | 23,196 | 21.2 |
| 30-39 | 163,378 | 13.0 | 83,406 | 16.9 | 21,635 | 19.8 |
| 40-49 | 174,966 | 14.0 | 66,311 | 13.4 | 16,924 | 15.5 |
| 50-59 | 189,573 | 15.1 | 67,687 | 13.7 | 15,788 | 14.4 |
| 60-69 | 142,020 | 11.3 | 54,363 | 11.0 | 10,705 | 9.8 |
| 70+ | 181,922 | 14.5 | 71,335 | 14.4 | 11,277 | 10.3 |
| Mean age at diagnosis (SD) | | 33 (21.4) | | 27 (21.6) | | 21.7 (19.7) | |
| Median age at diagnosis (IQR) | | 32 (13–49) | | 22 (8–44) | | 14 (5–35) | |
| Ethnicity | White | 1,021,342 | 84.1 | 292,968 | 95.4 | 93,027 | 91.7 |
| Black | 47,569 | 3.9 | 1,466 | 0.5 | 650 | 0.6 |
| Asian | 97,789 | 8.1 | 4,414 | 1.4 | 2,529 | 2.5 |
| Mixed | 23,129 | 1.9 | 1,756 | 0.5 | 893 | 0.9 |
| Other | 15,140 | 1.3 | 6,450 | 2.1 | 1,549 | 1.5 |
| Not stated | 8,851 | 0.7 | 10 | 0.1 | 2,752 | 2.7 |
| Missing (% of cohort) | 40,343 (3.2) | | 187,850 (38.0) | | 8,010 (7.3) | |
| Socio-economic status quintiles (IMD 2019 in CPRD; WIMD 2019 in SAIL; SIMD 2020v2 in DataLoch) | Least deprived | 249,472 | 19.9 | 89,030 | 18.3 | 29,710 | 27.7 |
| Second least deprived | 246,962 | 19.7 | 85,681 | 17.6 | 20,507 | 19.1 |
| Middle | 237,076 | 18.9 | 99,574 | 20.5 | 17,896 | 16.7 |
| Second most deprived | 255,192 | 20.4 | 10,0733 | 20.7 | 23,995 | 22.3 |
| Most deprived | 264,512 | 21.1 | 11,1585 | 22.9 | 15,318 | 14.3 |
| Missing (% of cohort) | 949 (0.1) | | 8,311 (1.7) | | 1,984 (1.8) | |
| Region  (CPRD only) | North East England | 40,658 | 3.2 | - |  | - | - |
| North West England | 248,805 | 19.8 | - |  | - | - |
| Yorkshire and the Humber | 41,803 | 3.3 | - |  | - | - |
| East Midlands | 25,571 | 2.0 | - |  | - | - |
| West Midlands | 210,732 | 16.8 | - |  | - | - |
| East of England | 51,661 | 4.1 | - |  | - | - |
| London | 219,921 | 17.5 | - |  | - | - |
| South East England | 256,687 | 20.5 | - |  | - | - |
| South West England | 158,325 | 12.6 | - |  | - | - |
| Body mass index (most recent past 5 years where age is 18+) | Underweight (<18.5) | 15,236 | 1.4 | 5,472 | 1.9 | 1,519 | 2.7 |
| Normal (18.5–24.9) | 246,958 | 23.4 | 75,187 | 25.6 | 18,396 | 32.3 |
| Overweight (25–29.9) | 282,618 | 26.7 | 92,180 | 31.3 | 17,032 | 29.9 |
| Obese (≥30) | 302,164 | 28.6 | 121,334 | 41.2 | 19,936 | 35.0 |
| Missing (% of adult cohort) | 210,282 (19.9) | | 143,858 (32.8) | | 42,642 (42.8) | |
| Smoking Status (most recent past 5 years) | Never | 319,431 | 33.3 | 174,254 | 50.0 | 35,863 | 43.8 |
| Ex | 473,197 | 49.4 | 99,295 | 28.5 | 29,155 | 35.6 |
| Current | 165,640 | 17.3 | 75,028 | 21.5 | 16,816 | 20.5 |
| Missing (% of adult cohort) | 98,990 (9.4) | | 89,454 (20.4) | | 17,691 (17.8) | |
| Asthma medication use (any prescription in 2019, not mutually exclusive) | Short-acting beta agonist (SABA) | 707,228 | 56.4 | 221,848 | 44.8 | 49,007 | 44.8 |
| Short-acting muscarinic antagonist (SAMA) | 4,783 | 0.4 | 1,269 | 0.3 | 191 | 0.2 |
| Long-acting beta agonist (LABA) | 10,103 | 0.8 | 2,842 | 0.6 | 549 | 0.5 |
| Long-acting muscarinic antagonist (LAMA) | 59,383 | 4.7 | 13,432 | 2.7 | 3,994 | 3.7 |
| Inhaled corticosteroids (ICS) | 350,022 | 27.9 | 90,963 | 18.4 | 20,806 | 19.0 |
| Combined SABA and SAMA | 0 | 0.0 | 49 | 0.1 | 0 | 0.0 |
| Combined LABA and LAMA | 7,976 | 0.6 | 0 | 0.0 | 617 | 0.6 |
| Combined LABA and ICS | 356,733 | 28.4 | 81,870 | 16.5 | 25,897 | 23.7 |
| Oral corticosteroids (OCS) | 188,038 | 15.0 | 69,152 | 14.0 | 14,123 | 12.9 |
| Triple therapy | 17,165 | 1.4 | 51 | 0.1 | 1,688 | 1.5 |
| Theophylline | 5,636 | 0.4 | 2,228 | 0.5 | 338 | 0.3 |
| None | 386,405 | 30.8 | 216,182 | 43.7 | 47,042 | 43.0 |

**Table S5: Characteristics of adults ≥ 35 years old living with COPD in England, Wales and South-East Scotland alive and registered with GP on 31st December 2019.**

|  |  | England (CPRD) | | Wales (SAIL) | | South-East Scotland (DataLoch) | |
| --- | --- | --- | --- | --- | --- | --- | --- |
| N | % of non-missing total | N | % of non-missing total | N | % of non-missing total |
| Total |  | 281,013 | 100 | 94,118 | 100 | 20,663 | 100 |
| Sex | Male | 144,070 | 51.3 | 46,357 | 49.2 | 9895 | 47.9 |
| Female | 136,943 | 48.7 | 47,761 | 50.8 | 10,768 | 52.1 |
| Age as of 31 December 2019 | 35–59 | 57,327 | 20.4 | 18,695 | 19.9 | 4,682 | 22.7 |
| 60–69 | 73,478 | 26.2 | 25,324 | 26.9 | 5,972 | 28.9 |
| 70–79 | 91,684 | 32.6 | 32,125 | 34.1 | 6,587 | 31.9 |
| ≥80 | 58,524 | 20.8 | 17,974 | 19.1 | 3,422 | 16.6 |
| Mean age at diagnosis (SD) | | 63 (11.6) | | 62 (11.1) | | 61 (11.3) | |
| Median age at diagnosis (IQR) | | 63 (55–71) | | 63 (55–70) | | 61 (52–69) | |
| Ethnicity | White | 263,576 | 94.6 | 57,178 | 98.2 | 18,500 | 94.7 |
| Black | 3,707 | 1.3 | 79 | 0.1 | 32 | 0.2 |
| Asian | 7,668 | 2.8 | 254 | 0.4 | 103 | 0.5 |
| Mixed | 1,232 | 0.4 | 73 | 0.1 | 25 | 0.1 |
| Other | 1,484 | 0.5 | 646 | 1.2 | 105 | 0.5 |
| Not stated† | 955 | 0.3 | - | - | 773 | 4.0 |
| Missing (% of cohort) | 2,391 (0.9) | | 35,888 (38.2) | | 1125 (5.4) | |
| Socio-economic status quintiles (IMD 2019 in CPRD; WIMD 2019 in SAIL; SIMD 2020v2 in DataLoch) | Least deprived | 40,164 | 14.3 | 11,149 | 12.1 | 3208 | 15.6 |
| Second least deprived | 49,656 | 17.7 | 15,015 | 16.2 | 2716 | 13.2 |
| Middle | 52,986 | 18.9 | 19,078 | 20.7 | 3684 | 18.0 |
| Second most deprived | 61,809 | 22.0 | 21,292 | 23.1 | 6281 | 30.6 |
| Most deprived | 76,214 | 27.1 | 25,716 | 27.9 | 4629 | 22.6 |
| Missing (% of cohort) | 184 (0.1) | | 1,868 (2.0) | | 145 (0.7) | |
| Region  (CPRD only) | North East England | 13,430 | 4.8 | - | - | - | - |
| North West England | 66,020 | 23.5 | - | - | - | - |
| Yorkshire and the Humber | 9,983 | 3.6 | - | - | - | - |
| East Midlands | 5,134 | 1.8 | - | - | - | - |
| West Midlands | 50,354 | 17.9 | - | - | - | - |
| East of England | 10,248 | 3.7 | - | - | - | - |
| London | 39,959 | 14.2 | - | - | - | - |
| South East England | 50,342 | 17.9 | - | - | - | - |
| South West England | 35,543 | 12.7 | - | - | - | - |
| Body mass index (most recent past 5 years) | Underweight (<18.5) | 12,128 | 4.5 | 3,459 | 4.1 | 1,051 | 6.1 |
| Normal (18.5–24.9) | 83,767 | 31.1 | 23,706 | 28.0 | 5,609 | 32.4 |
| Overweight (25–29.9) | 87,567 | 32.6 | 27,177 | 32.1 | 5,250 | 30.3 |
| Obese (≥30) | 85,499 | 31.8 | 30,262 | 35.8 | 5,418 | 31.3 |
| Missing (% of cohort) | 12,052 (4.3) | | 9,514 (10.1) | | 3,335 (16.1) | |
| Smoking Status  (most recent past 5 years) | Never | 17,068 | 6.2 | 13,886 | 15.4 | 874 | 4.4 |
| Ex | 170,616 | 62.0 | 46,557 | 51.2 | 10,516 | 53.2 |
| Current | 87,625 | 31.8 | 29,874 | 33.4 | 8,395 | 42.4 |
| Missing (% of cohort) | 5,704 (2.0) | | 3,801 (4.0) | | 878 (4.2) | |
| COPD medication use (any prescription in 2019, not mutually exclusive) | Short-acting beta agonist (SABA) | 200,919 | 71.5 | 65,190 | 69.3 | 14,584 | 70.6 |
| Short-acting muscarinic antagonist (SAMA) | 4,268 | 1.5 | 1,010 | 1.1 | 333 | 1.6 |
| Long-acting beta agonist (LABA) | 8,143 | 2.9 | 1,993 | 2.1 | 253 | 1.2 |
| Long-acting muscarinic antagonist (LAMA) | 110,261 | 39.2 | 16,465 | 17.5 | 7,892 | 38.2 |
| Inhaled corticosteroids (ICS) | 79,707 | 7.0 | 5,820 | 6.2 | 871 | 4.2 |
| Combined SABA and SAMA | 0.0 | 0.0 | 38 | 0.1 | 0.0 | 0.0 |
| Combined LABA and LAMA | 36,839 | 13.1 | 0 | 0.0 | 2,816 | 13.6 |
| Combined LABA and ICS | 121,243 | 43.1 | 24,768 | 26.3 | 7,961 | 38.5 |
| Oral corticosteroids (OCS) | 104,305 | 37.1 | 34,546 | 36.7 | 7,242 | 35.0 |
| Triple therapy | 37,990 | 13.5 | 48 | 0.1 | 3,524 | 17.1 |
| Theophylline | 5,176 | 1.8 | 1,693 | 1.8 | 227 | 1.1 |
| PDE4 inhibitors | 91 | 0.0 | 16 | 0.1 | 0.0 | 0.0 |
| Antibiotics | 148,651 | 52.9 | 49,906 | 53.0 | 10,808 | 52.3 |
| None | 35,416 | 12.6 | 16,527 | 17.6 | 2,867 | 13.9 |
| GOLD Stage (most recent in past 5 years) | Stage 1: FEV1 percent predicted ≥ 80% (mild obstruction in airflow) | 64,033 | 27.7 | 15,088 | 27.6 | 5,224 | 35.5 |
| Stage 2: 50% ≥ FEV1 > 80% (moderate) | 115,366 | 49.9 | 27,883 | 50.9 | 7,020 | 47.7 |
| Stage 3: 30% ≥ FEV1 ≥ 50% (severe) | 42,646 | 18.5 | 9,675 | 17.7 | 2,135 | 14.5 |
| Stage 4: FEV1 < 30% (very severe) | 8,976 | 3.9 | 2,098 | 3.8 | 335 | 2.3 |
| Missing (% of cohort) | 49,992 (17.8) | | 39,374 (41.8) | | 5949 (28.8) | |

† Counts for ‘Not stated’ ethnicity have been combined with ‘Missing’ where counts < 5

**Table S6: Characteristics of adults ≥ 40 years old living with ILD in England, Wales and South-East Scotland alive and registered with GP on 31st December 2019.**

|  | | England (CPRD Aurum) | | Wales (SAIL) | | South-East Scotland (DataLoch) | |
| --- | --- | --- | --- | --- | --- | --- | --- |
| N | % of non-missing total | N | % of non-missing total | N | % of non-missing total |
| Total |  | 25,591 | 100 | 10,342 | 100 | 2,299 | 100 |
| Sex | Male | 15,665 | 61.2 | 6,503 | 62.8 | 880 | 61.7 |
| Female | 9,926 | 38.8 | 3,839 | 37.2 | 1419 | 38.3 |
| Age as of 31 December 2019 | 40–59 | 4,159 | 16.3 | 1,327 | 12.8 | 305 | 13.3 |
| 60–69 | 5,050 | 19.7 | 2,111 | 20.4 | 496 | 21.6 |
| 70–79 | 8,839 | 34.5 | 3,863 | 37.4 | 804 | 35.0 |
| ≥80 | 7,543 | 29.5 | 3,041 | 29.4 | 694 | 30.2 |
| Mean age at diagnosis (SD) | | 67 (12.4) | | 66 (12.8) | | 65 (12.3) | |
| Median age at diagnosis (IQR) | | 68 (58–76) | | 68 (57–76) | | 66 (56–75) | |
| Ethnicity | White | 22,852 | 89.6 | 5,890 | 97.5 | 2,065 | 94.4 |
| Black | 691 | 2.7 | 16 | 0.3 | <10 | - |
| Asian | 1,525 | 6.0 | 50 | 0.8 | 25 | 1.1 |
| Mixed | 178 | 0.7 | 15 | 0.2 | <10 | - |
| Other | 169 | 0.7 | 70 | 1.2 | <10 | - |
| Not stated† | 85 | 0.3 | 0 | 0 | 86 | 3.9 |
| Missing (% of cohort) | 91 (0.4) | | 4,301 (41.5) | | 112 (4.9) | |
| Socio-economic status quintiles (IMD 2019 in CPRD; WIMD 2019 in SAIL; SIMD 2020v2 in DataLoch) | Least deprived | 5,506 | 21.5 | 2,123 | 21.0 | 610 | 26.7 |
| Second least deprived | 5,549 | 21.7 | 1,930 | 19.0 | 404 | 17.7 |
| Middle | 4,879 | 19.1 | 2,123 | 21 | 422 | 18.5 |
| Second most deprived | 4,841 | 18.9 | 2,086 | 20.5 | 545 | 23.9 |
| Most deprived | 4,798 | 18.8 | 1,869 | 18.5 | 304 | 13.3 |
| Missing (% of cohort) | 18 (0.1) | | 211 (2.0) | | 14 (0.6) | |
| Region (CPRD only) | North East England | 1,121 | 4.4 | - |  | - | - |
| North West England | 5,549 | 21.7 | - |  | - | - |
| Yorkshire and the Humber | 942 | 3.7 | - |  | - | - |
| East Midlands | 463 | 1.8 | - |  | - | - |
| West Midlands | 4,297 | 16.8 | - |  | - | - |
| East of England | 1,019 | 4.0 | - |  | - | - |
| London | 3,530 | 13.8 | - |  | - | - |
| South East England | 5,254 | 20.5 | - |  | - | - |
| South West England | 3,416 | 13.4 | - |  | - | - |
| Body mass index (most recent past 5 years) | Underweight (<18.5) | 576 | 2.5 | 186 | 2.2 | 68 | 3.7 |
| Normal (18.5–24.9) | 6,686 | 28.9 | 2,237 | 26.4 | 556 | 30.4 |
| Overweight (25–29.9) | 8,662 | 37.4 | 3,089 | 36.4 | 626 | 34.2 |
| Obese (≥30) | 7,250 | 31.3 | 2,970 | 35.0 | 578 | 31.6 |
| Missing (% of cohort) | 2,417 (9.4) | | 1,860 (18.0) | | 471 (20.5) | |
| Smoking Status (most recent past 5 years) | Never | 4,816 | 20.4 | 3,786 | 42.0 | 474 | 24.0 |
| Ex | 16,599 | 70.3 | 4,388 | 48.0 | 1,233 | 62.4 |
| Current | 2,192 | 9.3 | 926 | 10.0 | 269 | 13.6 |
| Missing (% of cohort) | 1,984 (7.8) | | 1,242 (12.0) | | 323 (14.0) | |
| ILD classification flags (not mutually exclusive) | IPF (broad definition) | 9,951 | 38.9 | 4,224 | 40.8 | 984 | 42.8 |
| IPF (narrow definition) | 2,329 | 9.1 | 1,103 | 10.6 | 125 | 5.4 |
| Autoimmune-related | 4,196 | 16.4 | 1,195 | 11.5 | 260 | 11.3 |
| Exposure-related | 7,107 | 27.8 | 3,242 | 31.3 | 719 | 31.3 |
| Treatment-related | 198 | 0.8 | 94 | 0.9 | 40 | 1.7 |
| Other | 7,587 | 29.7 | 2,960 | 28.6 | 604 | 26.3 |

† Counts for ‘Not stated’ ethnicity have been combined with ‘Missing’ where counts < 5.

**Section I)**

1. ***Cleaning weight, height and BMI***

**Figure S4** shows how the GP-entered BMI, weight and height values were cleaned in CPRD and SAIL; in DataLoch only the GP-entered BMI was used, however same-day duplicates were cleaned using the same methodology across all three EHR databases.

In CPRD, GP events comes with a numunitid variable (that is not always populated) which indicates the recorded unit of the numeric value. As these were not pre-cleaned or standardised, a mapping was created to convert numunitid into a useful new unit variable which was limited to: metres (m), centimetres (cm), feet (ft), inches (in), kilograms (kg), stones (st) and pounds (lb). Any other numunitid not in the mapping had a missing unit variable. Note in SAIL and DataLoch, there is no equivalent to the numunitid variable.

In CPRD and SAIL, once the values were cleaned, each weight value and the height closest in time, or the mean if multiple heights existed with each within 0.05 m, were used to create additional BMI values via the formula: BMI (kg/m2) = weight (kg) / height2 (m2). Note that for patients aged ≤ 18, the height closest in time was only used if it was within 30 days of the date that the weight was recorded. If there was a GP-entered and derived BMI value on the same day that were not the same, the GP-entered BMI was prioritised.

In DataLoch, BMI events from primary care were available from the DataLoch Observation table, which collates commonly requested variables for the DataLoch population across multiple sources.

1. *Cleaning spirometry values*

The cleaning of the raw values in CPRD and SAIL is explained in **Figure S5** below. As above, for CPRD, a mapping was generated to convert available numunitid for the spirometry values into a unit variable consisting of: percent predicted (% predicted), litres per second (L/s), and millilitres per second (mL/s). Additionally, a numunitid of 2305 corresponds to ‘predicted’ so any FEV1 values with that numunitid were treated as a predicted FEV1 value instead of FEV1.

In DataLoch, akin to the BMI variable, the FEV1, predicted FEV1, and FEV1 percent predicted values from primary care were taken from the DataLoch Observation table which contained values secondary care (RespNet) as well as GP records due to high missingness using GP records alone. The only difference with the GP codelist used was the omission of Read codes beginning with ‘33G’, as the associated data were mainly in free-text form and would require extensive cleaning to extract.

Across all three EHR databases, where there were multiple values per patient on the same day, for FEV1 and FEV1 percent predicted, only the highest (best) value was kept. However, for predicted FEV1, all same-day non-exact duplicates were dropped, as repeated measurements are not expected and we could replace these values with derived predicted FEV1 values.

Following cleaning, derived predicted and percent predicted values were generated. For deriving predicted FEV1 values, the same methodology as performed for BMI values was implemented to get most recent height.

**Figure S1: Flow chart illustrating the algorithm for determining an individual’s date of incidence and earliest mention of disease.**

**Figure S2: Flow chart illustrating the algorithm for determining the ethnicity status of a patient in CPRD and SAIL.** Note that ethnicity was derived internally by DataLoch using a similar algorithm. HES = Hospital Episode Statistics; PEDW = Patient Episode Dataset for Wales.

**Figure S3: The data cleaning process for smoking status**

**Figure S4: Flow chart illustrating the algorithm for cleaning raw BMI, weight, and height values in CPRD Aurum and SAIL. Same-day duplicates cleaned in the same way in DataLoch.**

**Figure S5: Flow chart illustrating the algorithm for cleaning raw FEV1, FEV1 predicted, and FEV1 % predicted values in CPRD Aurum and SAIL. Same-day duplicates cleaned in the same way in DataLoch.**
